# Supplementary material for: β-BaGa[B4O8(OH)](H2O) and Ba4Ga[B10O18(OH)5](H2O): new barium galloborates featuring unusual [B4O8(OH)]5− and [B10O18(OH)5]11− clusters
Source: Royal Society of Chemistry journal article supplement (doi:10.1039/c4ra06564f), 2014-01-01
Supplement: c4ra06564f1.pdf [file c4ra06564f1.pdf]

# **$\beta$ -BaGa[B<sub>4</sub>O<sub>8</sub>(OH)](H<sub>2</sub>O) and Ba<sub>4</sub>Ga[B<sub>10</sub>O<sub>18</sub>(OH)<sub>5</sub>](H<sub>2</sub>O): New Barium Galloborates Featuring Unusual [B<sub>4</sub>O<sub>8</sub>(OH)]<sup>2-</sup> and [B<sub>10</sub>O<sub>18</sub>(OH)<sub>5</sub>]<sup>11-</sup> Clusters**

Hui Yang,<sup>a,b</sup> Chun-Li Hu,<sup>a</sup> Jun-Ling Song,<sup>a</sup> Jiang-Gao Mao<sup>\*,a</sup>

5

## **Supporting Information**

Table S1. Important bond lengths (Å) for  $\beta$ -BaGa[B<sub>4</sub>O<sub>8</sub>(OH)](H<sub>2</sub>O) and Ba<sub>4</sub>Ga[B<sub>10</sub>O<sub>18</sub>(OH)<sub>5</sub>](H<sub>2</sub>O)

Table S2. Hydrogen bond lengths (Å) and bond angles(°) of  $\beta$ -BaGa[B<sub>4</sub>O<sub>8</sub>(OH)](H<sub>2</sub>O) and Ba<sub>4</sub>Ga[B<sub>10</sub>O<sub>18</sub>(OH)<sub>5</sub>](H<sub>2</sub>O) .

10 Table S3. The direction and magnitude of the dipole moments in the GaO<sub>4</sub>, BO<sub>3</sub> and BO<sub>4</sub> polyhedra, and net dipole moment in the unit cell of Ba<sub>4</sub>Ga[B<sub>10</sub>O<sub>18</sub>(OH)<sub>5</sub>](H<sub>2</sub>O) (D= Debye, Ba<sup>2+</sup> ions and water molecules were not considered).

Table S4. State energies (electronvolts) of the lowest conduction band (L-CB) and the highest valence band (H-VB) of  $\beta$ -BaGa[B<sub>4</sub>O<sub>8</sub>(OH)](H<sub>2</sub>O) and Ba<sub>4</sub>Ga[B<sub>10</sub>O<sub>18</sub>(OH)<sub>5</sub>](H<sub>2</sub>O).

15 Figure S1. Experimental and simulated powder X-ray diffraction patterns of  $\beta$ -BaGa[B<sub>4</sub>O<sub>8</sub>(OH)](H<sub>2</sub>O) and Ba<sub>4</sub>Ga[B<sub>10</sub>O<sub>18</sub>(OH)<sub>5</sub>](H<sub>2</sub>O). X-ray diffraction patterns of the residues of two compounds which were obtained after thermal annealing (at 700 °C for 5 h).

Figure S2. View of the coordination environments around the Ba atoms in  $\beta$ -BaGa[B<sub>4</sub>O<sub>8</sub>(OH)](H<sub>2</sub>O).

20 Figure S3. View of the coordination environments around the Ba atoms in Ba<sub>4</sub>Ga[B<sub>10</sub>O<sub>18</sub>(OH)<sub>5</sub>](H<sub>2</sub>O).

Figure S4. UV-vis-NIR absorption spectra of  $\beta$ -BaGa[B<sub>4</sub>O<sub>8</sub>(OH)](H<sub>2</sub>O) and Ba<sub>4</sub>Ga[B<sub>10</sub>O<sub>18</sub>(OH)<sub>5</sub>](H<sub>2</sub>O) .

25 Figure S5. UV-vis-NIR diffuse reflectance absorption spectra of  $\beta$ -BaGa[B<sub>4</sub>O<sub>8</sub>(OH)](H<sub>2</sub>O) and Ba<sub>4</sub>Ga[B<sub>10</sub>O<sub>18</sub>(OH)<sub>5</sub>](H<sub>2</sub>O).

Figure S6. IR spectra of  $\beta$ -BaGa[B<sub>4</sub>O<sub>8</sub>(OH)](H<sub>2</sub>O) and Ba<sub>4</sub>Ga[B<sub>10</sub>O<sub>18</sub>(OH)<sub>5</sub>](H<sub>2</sub>O).

Figure S7. Thermogravimetric analyses of  $\beta$ -BaGa[B<sub>4</sub>O<sub>8</sub>(OH)](H<sub>2</sub>O) and Ba<sub>4</sub>Ga[B<sub>10</sub>O<sub>18</sub>(OH)<sub>5</sub>](H<sub>2</sub>O) and  $\alpha$ -BaGa[B<sub>4</sub>O<sub>8</sub>(OH)](H<sub>2</sub>O).

30 Figure S8. Ferroelectric hysteresis loop of Ba<sub>4</sub>Ga[B<sub>10</sub>O<sub>18</sub>(OH)<sub>5</sub>](H<sub>2</sub>O)

**Table S1.** Important bond lengths (Å) for  $\beta$ -BaGa[B<sub>4</sub>O<sub>8</sub>(OH)](H<sub>2</sub>O) (**1**) and Ba<sub>4</sub>Ga[B<sub>10</sub>O<sub>18</sub>(OH)<sub>5</sub>](H<sub>2</sub>O) (**2**)<sup>a</sup>

| $\beta$ -BaGa[B <sub>4</sub> O <sub>8</sub> (OH)](H <sub>2</sub> O) ( <b>1</b> )                      |          |                |          |
|-------------------------------------------------------------------------------------------------------|----------|----------------|----------|
| Ba(1)-O(1W)                                                                                           | 2.699(6) | B(2)-O(8)      | 1.453(9) |
| Ba(1)-O(1)#1                                                                                          | 2.766(5) | B(2)-O(4)      | 1.468(9) |
| Ba(1)-O(7)                                                                                            | 2.767(4) | B(2)-O(3)      | 1.469(9) |
| Ba(1)-O(5)#2                                                                                          | 2.809(4) | B(2)-O(5)      | 1.483(8) |
| Ba(1)-O(4)                                                                                            | 2.833(4) | B(4)-O(9)      | 1.346(9) |
| Ba(1)-O(9)#3                                                                                          | 2.912(4) | B(4)-O(5)      | 1.356(9) |
| Ba(1)-O(8)#2                                                                                          | 2.920(4) | B(4)-O(6)      | 1.396(8) |
| Ba(1)-O(9)#4                                                                                          | 2.931(5) | B(3)-O(4)      | 1.347(8) |
| Ba(1)-O(6)#3                                                                                          | 2.965(4) | B(3)-O(8)      | 1.364(8) |
| Ba(1)-O(3)#2                                                                                          | 3.063(5) | B(3)-O(6)      | 1.411(8) |
| Ga(1)-O(7)#5                                                                                          | 1.855(4) | B(1)-O(2)      | 1.339(9) |
| Ga(1)-O(9)#3                                                                                          | 1.865(4) | B(1)-O(1)      | 1.375(9) |
| Ga(1)-O(8)                                                                                            | 1.882(4) | B(1)-O(3)      | 1.376(8) |
| Ga(1)-O(2)                                                                                            | 1.932(5) |                |          |
| Ga(1)-O(8)#6                                                                                          | 2.055(5) |                |          |
| Ba <sub>4</sub> Ga[B <sub>10</sub> O <sub>18</sub> (OH) <sub>5</sub> ](H <sub>2</sub> O) ( <b>2</b> ) |          |                |          |
| Ba(1)-O(23)#1                                                                                         | 2.732(4) | Ga(1)-O(1)     | 1.846(4) |
| Ba(1)-O(9)                                                                                            | 2.772(4) | Ga(1)-O(19)#10 | 1.869(4) |
| Ba(1)-O(2)#2                                                                                          | 2.785(3) | B(1)-O(1)      | 1.363(7) |
| Ba(1)-O(20)#1                                                                                         | 2.812(3) | B(1)-O(3)      | 1.372(7) |
| Ba(1)-O(3)                                                                                            | 2.922(4) | B(1)-O(2)      | 1.375(7) |
| Ba(1)-O(6)#3                                                                                          | 2.929(4) | B(2)-O(4)      | 1.438(7) |
| Ba(1)-O(11)                                                                                           | 2.957(4) | B(2)-O(8)      | 1.455(7) |
| Ba(1)-O(7)                                                                                            | 2.977(4) | B(2)-O(5)      | 1.457(7) |
| Ba(1)-O(17)#1                                                                                         | 3.000(3) | B(2)-O(2)      | 1.554(7) |
| Ba(1)-O(5)#2                                                                                          | 3.050(4) | B(3)-O(7)      | 1.444(7) |
| Ba(2)-O(7)#4                                                                                          | 2.722(3) | B(3)-O(4)      | 1.460(7) |
| Ba(2)-O(5)#3                                                                                          | 2.827(4) | B(3)-O(6)      | 1.470(7) |
| Ba(2)-O(11)#5                                                                                         | 2.834(4) | B(3)-O(3)      | 1.525(7) |
| Ba(2)-O(1W)                                                                                           | 2.879(4) | B(4)-O(8)      | 1.455(7) |
| Ba(2)-O(10)#4                                                                                         | 2.879(4) | B(4)-O(9)      | 1.485(7) |
| Ba(2)-O(2)                                                                                            | 2.881(4) | B(4)-O(7)      | 1.489(6) |
| Ba(2)-O(9)                                                                                            | 2.893(4) | B(4)-O(10)     | 1.498(6) |
| Ba(2)-O(14)                                                                                           | 3.117(4) | B(5)-O(11)     | 1.458(7) |
| Ba(2)-O(8)                                                                                            | 3.180(4) | B(5)-O(12)     | 1.458(7) |
| Ba(3)-O(18)                                                                                           | 2.746(4) | B(5)-O(9)      | 1.468(7) |
| Ba(3)-O(22)#6                                                                                         | 2.762(4) | B(5)-O(14)     | 1.521(7) |
| Ba(3)-O(6)#7                                                                                          | 2.784(3) | B(6)-O(10)     | 1.429(6) |
| Ba(3)-O(17)                                                                                           | 2.814(4) | B(6)-O(12)     | 1.465(7) |
| Ba(3)-O(21)#8                                                                                         | 2.816(4) | B(6)-O(13)     | 1.470(7) |
| Ba(3)-O(20)#6                                                                                         | 2.818(4) | B(6)-O(15)     | 1.523(7) |
| Ba(3)-O(3)#7                                                                                          | 2.824(3) | B(7)-O(16)     | 1.356(7) |
| Ba(3)-O(13)                                                                                           | 2.841(4) | B(7)-O(15)     | 1.373(8) |
| Ba(3)-O(19)#8                                                                                         | 2.888(4) | B(7)-O(14)     | 1.399(7) |
| Ba(3)-O(15)                                                                                           | 2.914(3) | B(8)-O(20)     | 1.435(7) |
| Ba(4)-O(8)                                                                                            | 2.652(4) | B(8)-O(17)     | 1.444(7) |
| Ba(4)-O(13)#5                                                                                         | 2.786(4) | B(8)-O(16)     | 1.489(6) |
| Ba(4)-O(14)#8                                                                                         | 2.866(4) | B(8)-O(18)     | 1.523(7) |
| Ba(4)-O(21)#8                                                                                         | 2.872(4) | B(9)-O(18)     | 1.361(7) |
| Ba(4)-O(1W)                                                                                           | 2.890(4) | B(9)-O(19)     | 1.366(7) |
| Ba(4)-O(10)                                                                                           | 2.903(4) | B(9)-O(21)     | 1.374(7) |
| Ba(4)-O(22)#8                                                                                         | 2.958(3) | B(10)-O(20)    | 1.440(7) |
| Ba(4)-O(16)#8                                                                                         | 2.958(4) | B(10)-O(22)    | 1.455(7) |
| Ba(4)-O(15)                                                                                           | 2.997(4) | B(10)-O(23)    | 1.465(7) |
| Ga(1)-O(17)#1                                                                                         | 1.806(4) | B(10)-O(21)    | 1.519(7) |
| Ga(1)-O(22)#9                                                                                         | 1.816(4) |                |          |

<sup>a</sup> Symmetry transformations used to generate equivalent atoms:

For **1**: #1 -x+1, -y+1, -z; #2 x+1, y, z; #3 -x, -y+1, -z; #5 x-1/2, y-1/2, z; #6 -x-1/2, -y+1/2, -z.

For **2**: #1 -x+1, -y+1, -z; #2 x-1, y, z; #3 x-1/2, y-1/2, z; #4 x+1/2, y-1/2, z; #5 x+1, y, z; #6 x-1/2, y+1/2, z; #7 x-1/2, -y+3/2, z-1/2; #8 x+1/2, y+1/2, z; #9 x+1/2, -y+1/2, z+1/2; #10 x+1, -y+1, z+1/2.

**Table S2.** Hydrogen bond lengths (Å) and bond angles(°)

| $\beta$ -BaGa[B <sub>4</sub> O <sub>8</sub> (OH)](H <sub>2</sub> O) (1)                      |       |       |          |        |
|----------------------------------------------------------------------------------------------|-------|-------|----------|--------|
| O1-H8A···O2                                                                                  | 0.820 | 1.892 | 2.700(7) | 168.68 |
| O1W-H1WA···O3                                                                                | 0.850 | 1.888 | 2.696(8) | 158.24 |
| Ba <sub>4</sub> Ga[B <sub>10</sub> O <sub>18</sub> (OH) <sub>5</sub> ](H <sub>2</sub> O) (2) |       |       |          |        |
| O5-H5A···O12                                                                                 | 0.82  | 1.87  | 2.685(5) | 169.1  |
| O11-H11A···O4                                                                                | 0.82  | 1.91  | 2.707(5) | 165.2  |
| O23-H23A···O1                                                                                | 0.82  | 2.19  | 2.996(6) | 167.2  |
| O1W-H1WA···O19                                                                               | 0.85  | 2.15  | 2.813(5) | 134.6  |
| O1W-H1WB···O12                                                                               | 0.85  | 2.17  | 2.666(5) | 117.3  |

**Table S3** The direction and magnitude of the dipole moments in the GaO<sub>4</sub>, BO<sub>3</sub> and BO<sub>4</sub> polyhedra, and net dipole moment in the unit cell of Ba<sub>4</sub>Ga[B<sub>10</sub>O<sub>18</sub>(OH)<sub>5</sub>](H<sub>2</sub>O) (2) (D= Debye, Ba<sup>2+</sup> ions and water molecules were not considered).

| Species                         | Total magnitude | x (D)  | y (D) | z (D)  |
|---------------------------------|-----------------|--------|-------|--------|
| B(1)O <sub>3</sub>              | 1.33            | -0.62  | ±0.72 | -0.92  |
| B(7)O <sub>3</sub>              | 1.46            | -0.47  | ±1.36 | 0.26   |
| B(9)O <sub>3</sub>              | 0.98            | -0.017 | ±0.96 | 0.20   |
| B(2)O <sub>4</sub>              | 2.10            | 0.62   | ±1.64 | 1.15   |
| B(3)O <sub>4</sub>              | 1.56            | 0.67   | ±0.37 | 1.35   |
| B(4)O <sub>4</sub>              | 0.84            | -0.49  | ±0.67 | -0.082 |
| B(5)O <sub>4</sub>              | 1.17            | -0.30  | ±0.33 | -1.09  |
| B(6)O <sub>4</sub>              | 2.14            | -1.12  | ±1.00 | -1.52  |
| B(8)O <sub>4</sub>              | 1.98            | -1.97  | 0     | 0.23   |
| B(10)O <sub>4</sub>             | 0.97            | -0.53  | ±0.80 | 0.072  |
| GaO <sub>4</sub>                | 1.17            | 0.89   | ±0.57 | 0.49   |
| Net dipole moment (a unit cell) | 13.44           | -13.42 | 0     | 0.67   |

**Table S4.** State energies (electronvolts) of the lowest conduction band (L-CB) and the highest valence band (H-VB) of  $\beta$ -BaGa[B<sub>4</sub>O<sub>8</sub>(OH)](H<sub>2</sub>O) (**1**) and Ba<sub>4</sub>Ga[B<sub>10</sub>O<sub>18</sub>(OH)<sub>5</sub>](H<sub>2</sub>O) (**2**)

|                                                                                                       | <i>k</i> -point       | L-CB    | H-VB     |
|-------------------------------------------------------------------------------------------------------|-----------------------|---------|----------|
| $\beta$ -BaGa[B <sub>4</sub> O <sub>8</sub> (OH)](H <sub>2</sub> O) ( <b>1</b> )                      | V(0.000 0.000 0.500)  | 5.43195 | -0.01745 |
|                                                                                                       | G(0.000 0.000 0.000)  | 5.17593 | -0.02285 |
|                                                                                                       | F(0.000 0.500 0.000)  | 6.23751 | -0.08155 |
|                                                                                                       | Q(0.000 0.500 0.500)  | 6.32449 | -0.02391 |
|                                                                                                       | Z(0.000 0.000 0.500)  | 5.90506 | -0.0028  |
|                                                                                                       | G(0.000 0.000 0.000)  | 5.17593 | -0.02285 |
| Ba <sub>4</sub> Ga[B <sub>10</sub> O <sub>18</sub> (OH) <sub>5</sub> ](H <sub>2</sub> O) ( <b>2</b> ) | Z(0.000 0.000 0.500)  | 4.39315 | -0.00103 |
|                                                                                                       | G(0.000 0.000 0.000)  | 4.29691 | -0.00047 |
|                                                                                                       | Y(0.000 0.500 0.000)  | 4.58321 | -0.00352 |
|                                                                                                       | A(-0.500 0.500 0.000) | 4.92749 | -0.00735 |
|                                                                                                       | B(-0.500 0.000 0.000) | 4.96056 | -0.1273  |
|                                                                                                       | D(-0.500 0.000 0.500) | 4.98638 | -0.01279 |
|                                                                                                       | E(-0.500 0.500 0.500) | 4.92245 | -0.00741 |
|                                                                                                       | C(0.000 0.500 0.500)  | 4.64867 | -0.00506 |

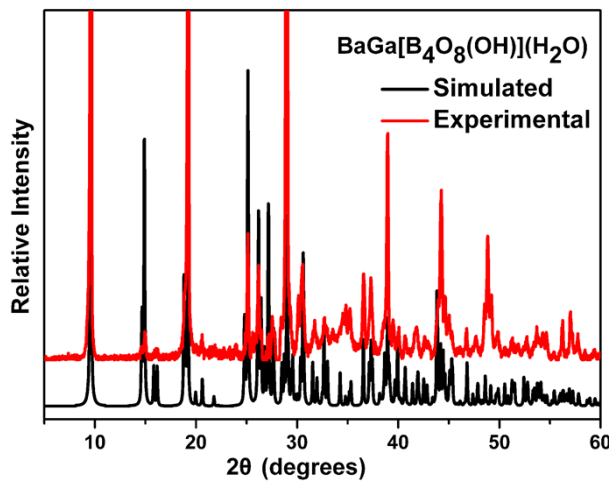

(a)

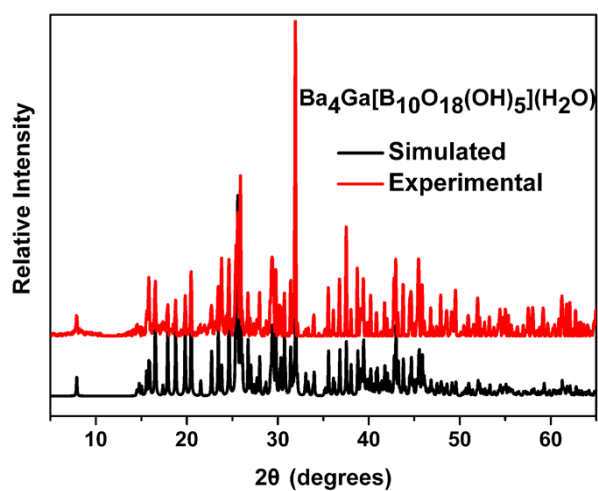

(b)

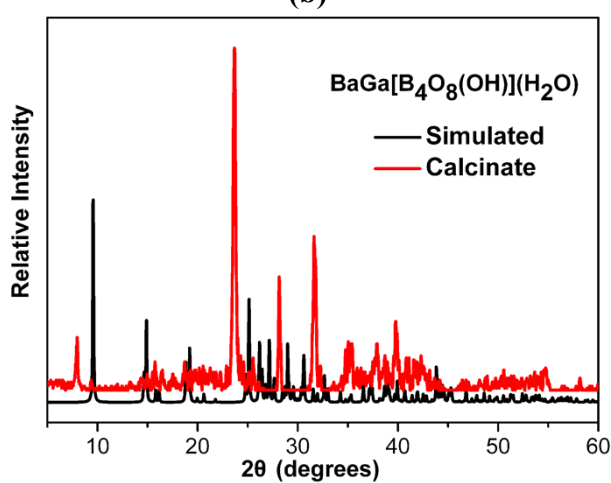

(c)

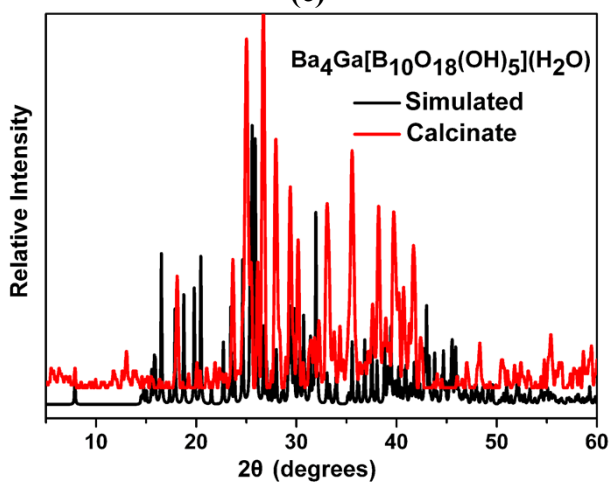

(d)

**Figure S1.** Experimental and simulated powder X-ray diffraction patterns of  $\beta$ - $\text{BaGa}[\text{B}_4\text{O}_8(\text{OH})](\text{H}_2\text{O})$  (**1**) (a) and  $\text{Ba}_4\text{Ga}[\text{B}_{10}\text{O}_{18}(\text{OH})_5](\text{H}_2\text{O})$  (**2**) (b). X-ray diffraction patterns of the residues of  $\beta$ - $\text{BaGa}[\text{B}_4\text{O}_8(\text{OH})](\text{H}_2\text{O})$  (**1**) (c) and  $\text{Ba}_4\text{Ga}[\text{B}_{10}\text{O}_{18}(\text{OH})_5](\text{H}_2\text{O})$  (**2**) (d) which were obtained after thermal annealing (at  $700^\circ\text{C}$  for 5 h).

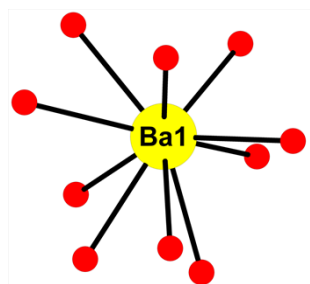

**Figure S2** View of the coordination environments around the Ba atoms in  $\beta$ -BaGa[B<sub>4</sub>O<sub>8</sub>(OH)](H<sub>2</sub>O) (**1**). Ba and O atoms are drawn as yellow and red circles, respectively.

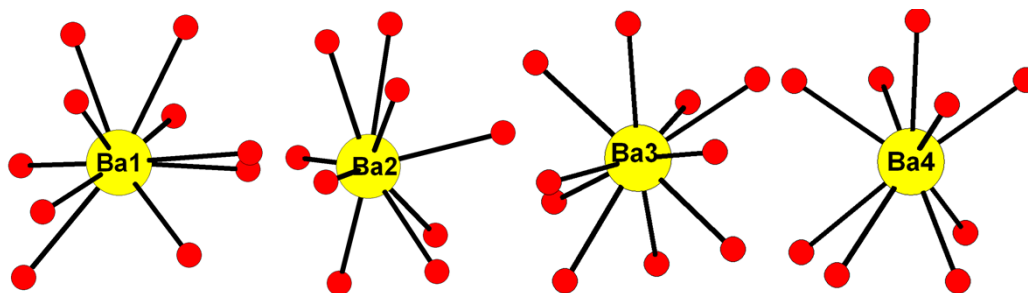

**Figure S3.** View of the coordination environments around the Ba atoms in Ba<sub>4</sub>Ga[B<sub>10</sub>O<sub>18</sub>(OH)<sub>5</sub>](H<sub>2</sub>O) (**2**). Ba and O atoms are drawn as yellow and red circles, respectively.

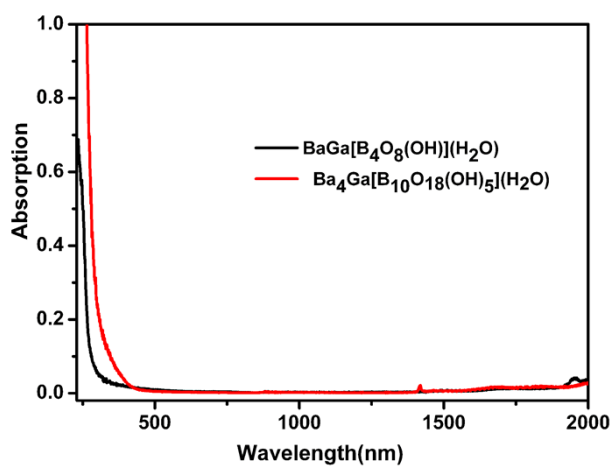

**Figure S4.** UV-vis-NIR absorption spectra of  $\beta$ -BaGa[B<sub>4</sub>O<sub>8</sub>(OH)](H<sub>2</sub>O) (**1**) and Ba<sub>4</sub>Ga[B<sub>10</sub>O<sub>18</sub>(OH)<sub>5</sub>](H<sub>2</sub>O) (**2**).

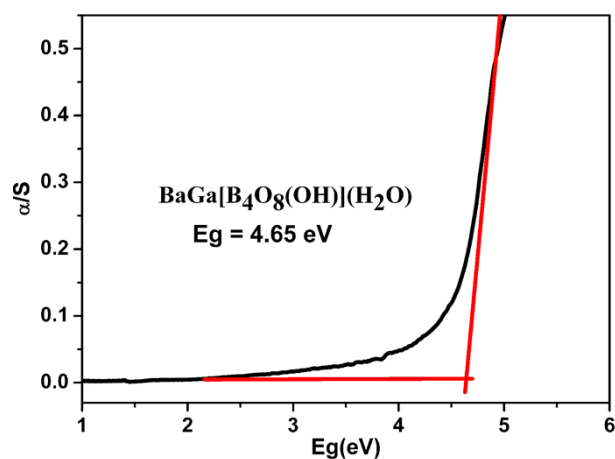

(a)

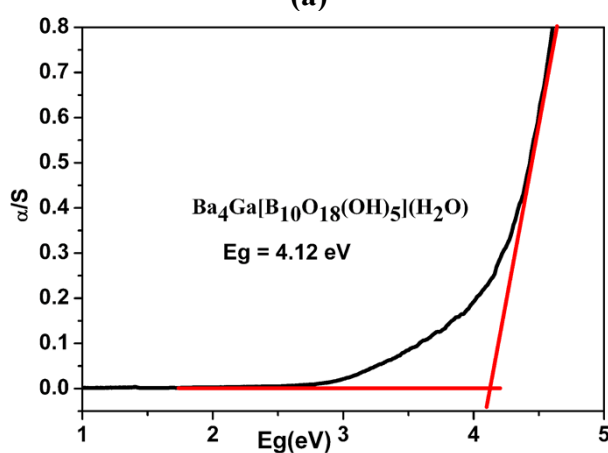

(b)

**Figure S5.** UV-vis-NIR diffuse reflectance absorption spectra of  $\beta$ -BaGa[B<sub>4</sub>O<sub>8</sub>(OH)](H<sub>2</sub>O) (1) and Ba<sub>4</sub>Ga[B<sub>10</sub>O<sub>18</sub>(OH)<sub>5</sub>](H<sub>2</sub>O) (2).

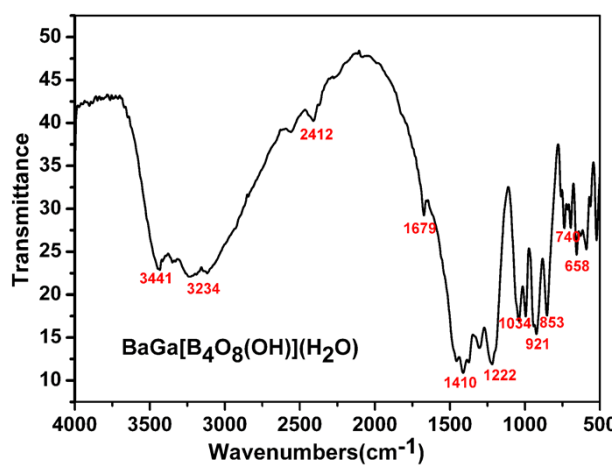

(a)

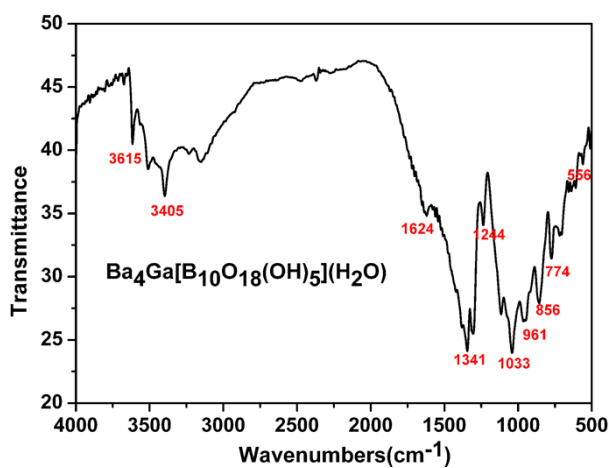

(b)

Figure S6. IR spectra of  $\beta\text{-BaGa}[\text{B}_4\text{O}_8(\text{OH})](\text{H}_2\text{O})$  (1) and  $\text{Ba}_4\text{Ga}[\text{B}_{10}\text{O}_{18}(\text{OH})_5](\text{H}_2\text{O})$  (2).

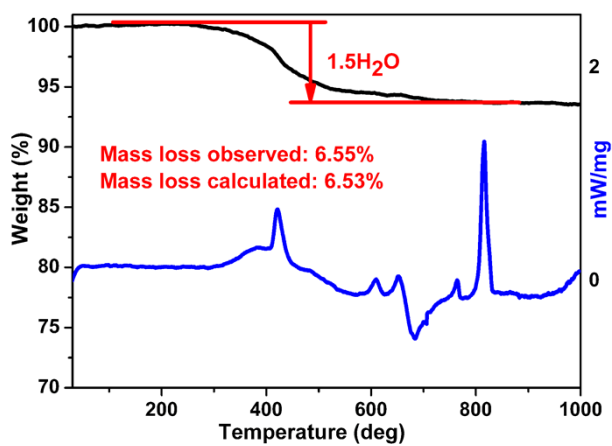

(a)

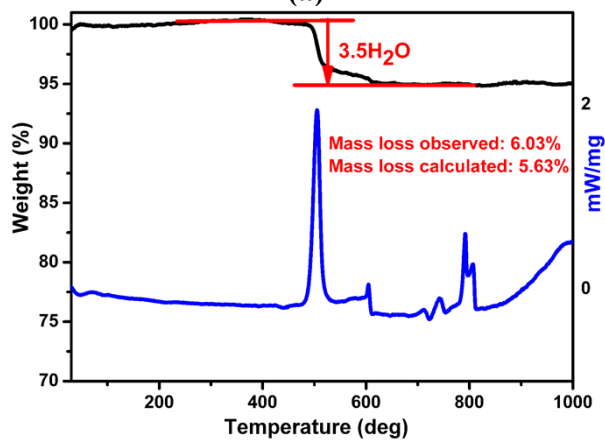

(b)



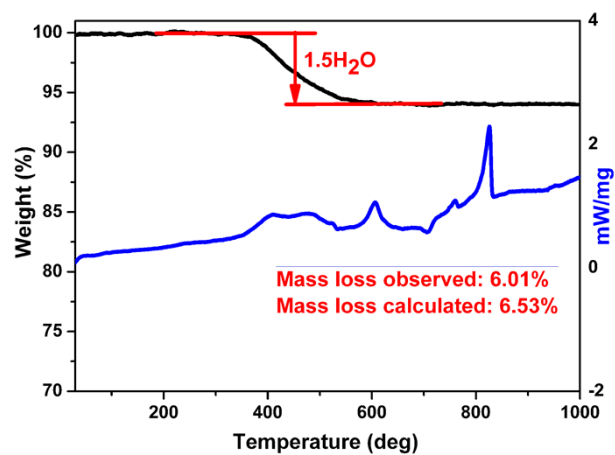

(c)

**Figure S7.** Thermogravimetric analyses of  $\beta$ -BaGa[B<sub>4</sub>O<sub>8</sub>(OH)](H<sub>2</sub>O) (1) (a), Ba<sub>4</sub>Ga[B<sub>10</sub>O<sub>18</sub>(OH)<sub>5</sub>](H<sub>2</sub>O) (2) (b) and  $\alpha$ -BaGa[B<sub>4</sub>O<sub>8</sub>(OH)](H<sub>2</sub>O) (c).

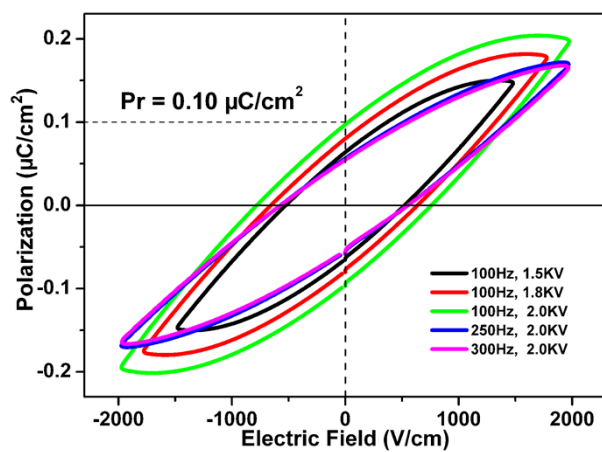

**Figure S8.** Ferroelectric hysteresis loop of compound Ba<sub>4</sub>Ga[B<sub>10</sub>O<sub>18</sub>(OH)<sub>5</sub>](H<sub>2</sub>O) (2)
